# Supplementary figures and images for: Race to the bottom: Bayesian optimisation for chemical problems
Source: Royal Society of Chemistry journal article supplement (doi:10.1039/d3dd00234a), 2024-01-01

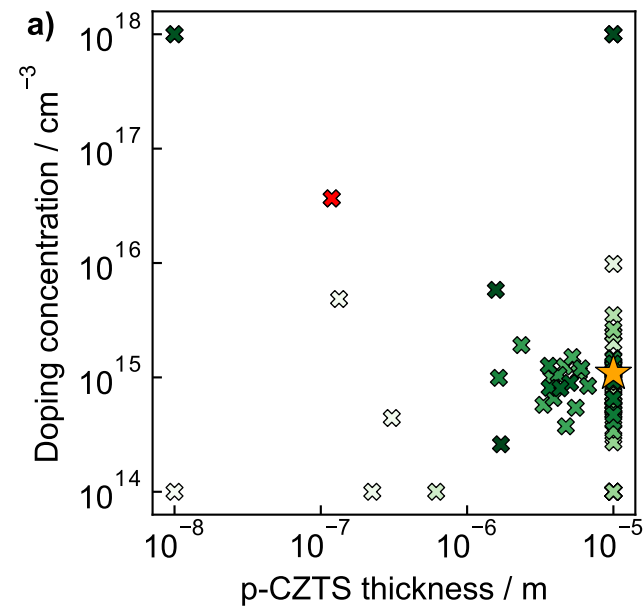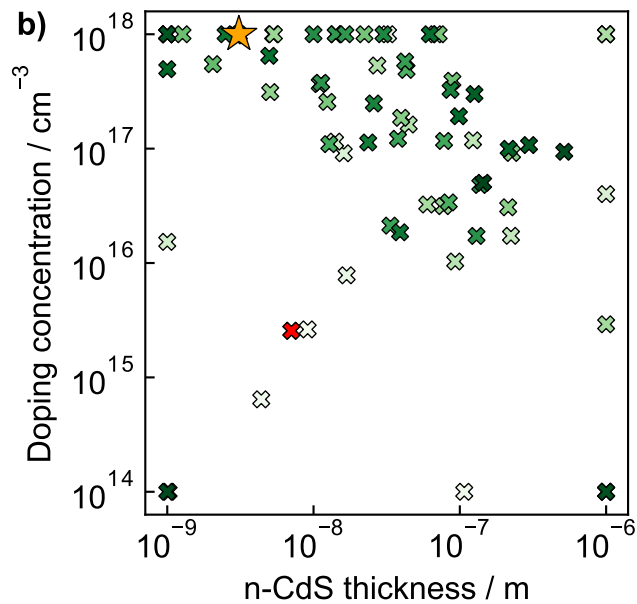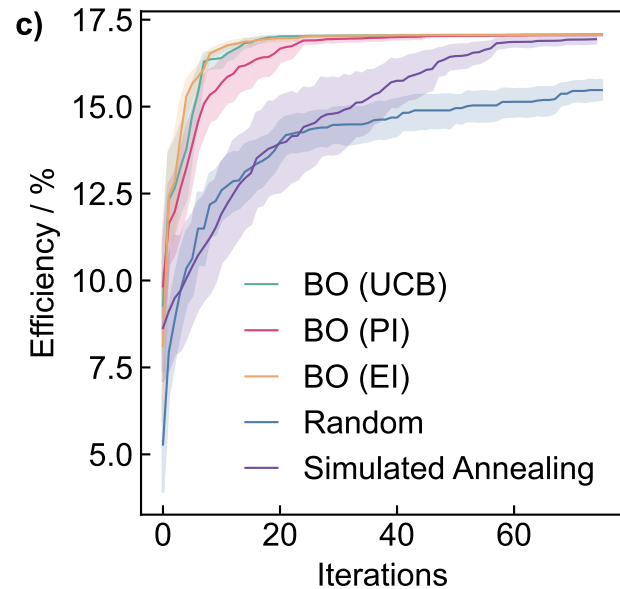

Supplement: d3dd00234a1.zip [file d3dd00234a1.zip]
